The author thanks Neal Cohen, M.D., Professor and Vice Dean, and Brian Cheesebro, M.D., Research Fellow (Department of Anesthesia and Perioperative Care, University of California, San Francisco, California) for editorial and conceptual help.

## References

1. Howland WS, Schweitzer O, Boyan CP, Dotto AC: Physiologic alterations with massive blood replacement. *Surg Gynecol Obstet* 1955; 101:478-82
2. Krevans VR, Jackson DP: Hemorrhagic disorder following massive whole blood transfusion. *JAMA* 1955; 159:171-7
3. Miller RD, Tong MS, Robbins TO: Effects of massive transfusion of blood on acid-base balance. *JAMA* 1971; 216:1762-5
4. Miller RD, Robbins TO, Tong MJ, Barton SL: Coagulation defects associated with massive blood transfusions. *Ann Surg* 1971; 174:794-801
5. American Society of Anesthesiologists Task Force: Practice guidelines for perioperative blood transfusions and adjuvant therapies. *ANESTHESIOLOGY* 2006; 105:198-208
6. Murray DJ, Pennell BJ, Weinstein SL, Olson JD: Packed red cells in acute blood loss: Dilutional coagulopathy as a cause of surgical bleeding. *Anesth Analg* 1995; 80:336-42
7. Miller RD: Coagulation and packed red blood cell transfusions. *Anesth Analg* 1995; 80:215-6
8. Leslie SD, Toy PT: Laboratory hemostatic abnormalities in massively transfused patients given red blood cells and crystalloid. *Am J Clin Pathol* 1991; 96:770-3
9. Erber WN, Tan J, Grey D, Lown JAG: Use of unrefrigerated fresh whole blood in massive transfusion. *Med J Austr* 1996; 165:11-3
10. Adamson JW: New blood, old blood, or no blood. *N Engl J Med* 2008; 358:1295-6
11. Miller RD: Transfusion therapy. In: Miller RD, Fleisher LA, Eriksson LI, Wiener-Kronish JP, Young WL, eds: *Miller's Anesthesia*, 7th edition. Philadelphia: Elsevier; 2009. pp. 1739-66
12. Miller RD: Complications of massive blood transfusions. *ANESTHESIOLOGY* 1973; 39:82-93
13. Brohi K, Cohen MJ, Ganter MT, Matthay MA, Mackensie RC, Pittet J-F: Acute traumatic coagulopathy: Initiated by hypoperfusion, modulated through the protein C pathway. *Ann Surg* 2007; 245:812-8

## ANESTHESIOLOGY REFLECTIONS

### The Blundell Gravitator

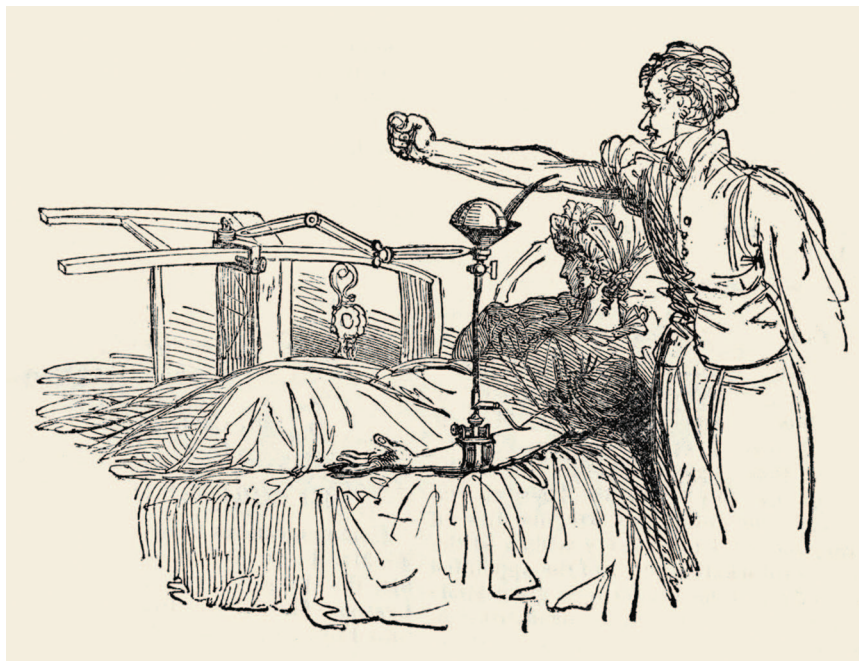

In 1829, "Observations on Transfusion of Blood" was published by British obstetrician James Blundell (1790–1878). Disturbed by the hemorrhagic deaths in childbirth that he had witnessed, Blundell designed his elevated funnel (clamped above to the overturned chair) or "Gravitator" for transfusing the "blood in a regulated stream from one individual to another." The invention worked using "ordinary venesection" on the donor and, on the recipient, "the insertion of a small tube into the vein usually laid open in bleeding. . . ." A lifelong bachelor, the eccentric Blundell slept in most mornings, saw patients at his home most afternoons, and made housecalls most evenings. (Copyright © the American Society of Anesthesiologists, Inc. This image appears in the *Anesthesiology Reflections* online collection available at [www.anesthesiology.org](http://www.anesthesiology.org).)

George S. Bause, M.D., M.P.H., Honorary Curator, ASA's Wood Library-Museum of Anesthesiology, Park Ridge, Illinois, and Clinical Associate Professor, Case Western Reserve University, Cleveland, Ohio. [UJYC@aol.com](mailto:UJYC@aol.com).
